# Supplementary material for: Novel Quantitative PCR for Rhodococcus equi and Macrolide Resistance Detection in Equine Respiratory Samples
Source: MDPI journal article supplement (doi:10.3390/ani12091172), 2022-05-03
Supplement: s1 [file s1]

**Table S1.** List of *R. equi* genomes included in the in-silico validation

| Genetic element | Strain   | Isolation source | Macrolide<br>susceptibility | GenBank no.  |
|-----------------|----------|------------------|-----------------------------|--------------|
| WGS             | lh_4_1   | Environment      | S                           | WUZO00000000 |
| WGS             | lh_25_1  | Environment      | S                           | WVAD00000000 |
| WGS             | lh_27_1  | Environment      | S                           | WVAA00000000 |
| WGS             | lh_29_1  | Environment      | S                           | WUZY00000000 |
| WGS             | lh_31_1  | Environment      | S                           | WUZV00000000 |
| WGS             | lh_33_1  | Environment      | S                           | WUZU00000000 |
| WGS             | lh_35_1  | Environment      | S                           | WUZS00000000 |
| WGS             | lh_37_1  | Environment      | S                           | WUZQ00000000 |
| WGS             | lh_39_1  | Environment      | S                           | WUZR00000000 |
| WGS             | lh_48_1  | Environment      | S                           | WUZH00000000 |
| WGS             | lh_54_1  | Environment      | S                           | WUYZ00000000 |
| WGS             | lh_57_1  | Environment      | S                           | WVDI00000000 |
| WGS             | lh_63_1  | Environment      | S                           | WVDD00000000 |
| WGS             | lh_65_1  | Environment      | S                           | WVDA00000000 |
| WGS             | lh_72_1  | Environment      | S                           | WVCU00000000 |
| WGS             | lh_11_1  | Environment      | S                           | SAMN13391722 |
| WGS             | lh_84_1  | Environment      | S                           | WVCJ00000000 |
| WGS             | lh_93_1  | Environment      | S                           | SAMN13391754 |
| WGS             | lh_96_1  | Environment      | S                           | WVDW00000000 |
| WGS             | lh_13_1  | Environment      | S                           | SAMN13391723 |
| WGS             | lh_108_1 | Environment      | S                           | WVBV00000000 |
| WGS             | lh_111_1 | Environment      | S                           | SAMN13391760 |
| WGS             | lh_42_1  | Environment      | S                           | WUZL00000000 |
| WGS             | lh_117_1 | Environment      | S                           | WVBM00000000 |
| WGS             | lh_120_1 | Environment      | S                           | WVBK00000000 |
| WGS             | lh_123_1 | Environment      | S                           | WVBj00000000 |
| WGS             | lh_126_1 | Environment      | S                           | WVBC00000000 |
| WGS             | lh_129_1 | Environment      | S                           | SAMN13391766 |
| WGS             | lh_132_1 | Environment      | S                           | WVAY00000000 |
| WGS             | lh_135_1 | Environment      | S                           | WVAV00000000 |
| WGS             | lh_138_1 | Environment      | S                           | SAMN13391769 |
| WGS             | lh_141_1 | Environment      | S                           | WVAR00000000 |
| WGS             | lh_144_1 | Environment      | S                           | WVAN00000000 |
| WGS             | lh_42_1  | Environment      | S                           | SAMN13391737 |
| WGS             | lh_69_1  | Environment      | S                           | SAMN13391746 |
| WGS             | lh_1_1   | Environment      | R                           | WVCG00000000 |
| WGS             | lh_20_1  | Environment      | R                           | WVAH00000000 |
| WGS             | lh_22_1  | Environment      | R                           | WVAF00000000 |
| WGS             | lh_24_1  | Environment      | R                           | WVAE00000000 |
| WGS             | lh_26_1  | Environment      | R                           | WVAB00000000 |
| WGS             | lh_28_1  | Environment      | R                           | WUZZ00000000 |
| WGS             | lh_30_1  | Environment      | R                           | WUZW00000000 |
| WGS             | lh_32_1  | Environment      | R                           | SAMN13391644 |
| WGS             | lh_34_1  | Environment      | R                           | WUZT00000000 |
| WGS             | lh_36_1  | Environment      | R                           | WUZP00000000 |
| WGS             | lh_41_1  | Environment      | R                           | WUZM00000000 |
| WGS             | lh_55_1  | Environment      | R                           | WVCB00000000 |
| WGS             | lh_58_1  | Environment      | R                           | WVDJ00000000 |
| WGS             | lh_61_1  | Environment      | R                           | WVDF00000000 |
| WGS             | lh_64_1  | Environment      | R                           | WVDC00000000 |
| WGS             | lh_67_1  | Environment      | R                           | WVDB00000000 |
| WGS             | lh_70_1  | Environment      | R                           | SAMN13391667 |
| WGS             | lh_8_1   | Environment      | R                           | WVCN00000000 |
| WGS             | lh_73_1  | Environment      | R                           | WVCS00000000 |
| WGS             | lh_79_1  | Environment      | R                           | WVCQ00000000 |

|     |          |             |   |              |
|-----|----------|-------------|---|--------------|
| WGS | lh_82_1  | Environment | R | WVCL00000000 |
| WGS | lh_85_1  | Environment | R | WVCI00000000 |
| WGS | lh_88_1  | Environment | R | WVCF00000000 |
| WGS | lh_91_1  | Environment | R | WVEB00000000 |
| WGS | lh_97_1  | Environment | R | SAMN13391685 |
| WGS | lh_100_1 | Environment | R | SAMN13391687 |
| WGS | lh_9_1   | Environment | R | WVEI00000000 |
| WGS | lh_106_1 | Environment | R | WVBW00000000 |
| WGS | lh_109_1 | Environment | R | WVBU00000000 |
| WGS | lh_112_1 | Environment | R | WVBR00000000 |
| WGS | lh_115_1 | Environment | R | WVBQ00000000 |
| WGS | lh_118_1 | Environment | R | WVBN00000000 |
| WGS | lh_124_1 | Environment | R | SAMN13391703 |
| WGS | lh_127_1 | Environment | R | WVBE00000000 |
| WGS | lh_130_1 | Environment | R | WVBB00000000 |
| WGS | lh_10_1  | Environment | R | WVCD00000000 |
| WGS | lh_133_1 | Environment | R | WVAZ00000000 |
| WGS | lh_136_1 | Environment | R | WVAW00000000 |
| WGS | lh_12_1  | Environment | R | WVBL00000000 |
| WGS | lh_14_1  | Environment | R | WVAS00000000 |
| WGS | lh_16_1  | Environment | R | WVAM00000000 |
| WGS | lh_18_1  | Environment | R | WVAK00000000 |
| WGS | lh_2_1   | Environment | R | WVAI00000000 |
| WGS | lh_6_1   | Environment | R | WVDG00000000 |
| WGS | lh_47_1  | Environment | R | WUZF00000000 |
| WGS | lh_50_1  | Environment | R | WUZD00000000 |
| WGS | lh_53_1  | Environment | R | WUZA00000000 |
| WGS | lh_56_1  | Environment | R | WVCC00000000 |
| WGS | lh_62_1  | Environment | R | WVDE00000000 |
| WGS | lh_65_1  | Environment | R | WVCY00000000 |
| WGS | lh_68_1  | Environment | R | WVCX00000000 |
| WGS | lh_71_1  | Environment | R | WVCW00000000 |
| WGS | lh_74_1  | Environment | R | SAMN13391670 |
| WGS | lh_80_1  | Environment | R | WVCO00000000 |
| WGS | lh_83_1  | Environment | R | WVCK00000000 |
| WGS | lh_86_1  | Environment | R | WVCE00000000 |
| WGS | lh_89_1  | Environment | R | WVDY00000000 |
| WGS | lh_92_1  | Environment | R | SAMN13391682 |
| WGS | lh_95_1  | Environment | R | WVDP00000000 |
| WGS | lh_98_1  | Environment | R | WVEL00000000 |
| WGS | lh_101_1 | Environment | R | SAMN13391688 |
| WGS | lh_104_1 | Environment | R | WVBY00000000 |
| WGS | lh_113_1 | Environment | R | WVBS00000000 |
| WGS | lh_116_1 | Environment | R | WVBO00000000 |
| WGS | lh_119_1 | Environment | R | SAMN13391700 |
| WGS | lh_122_1 | Environment | R | WVBI00000000 |
| WGS | lh_125_1 | Environment | R | WVBG00000000 |
| WGS | lh_128_1 | Environment | R | WVBD00000000 |
| WGS | lh_131_1 | Environment | R | WVBA00000000 |
| WGS | lh_137_1 | Environment | R | SAMN13391712 |
| WGS | lh_140_1 | Environment | R | WVAT00000000 |
| WGS | lh_16    | Horse       | R | WUXS00000000 |
| WGS | lh_17    | Horse       | R | WUXR00000000 |
| WGS | lh_18    | Horse       | R | WUXQ00000000 |
| WGS | lh_19    | Horse       | R | WUXP00000000 |
| WGS | lh_20    | Horse       | R | WUXO00000000 |
| WGS | lh_21    | Horse       | R | WUYT00000000 |
| WGS | lh_24    | Horse       | R | WUXL00000000 |
| WGS | lh_25    | Horse       | R | WUXK00000000 |

|          |              |             |   |               |
|----------|--------------|-------------|---|---------------|
| WGS      | lh_26        | Horse       | R | WUXJ00000000  |
| WGS      | lh_27        | Horse       | R | WUYS00000000  |
| WGS      | lh_28        | Horse       | R | WUXI00000000  |
| WGS      | lh_29        | Horse       | R | WUXH00000000  |
| WGS      | lh_30        | Horse       | R | WUXG00000000  |
| WGS      | lh_32        | Horse       | R | WUYR00000000  |
| WGS      | lh_34        | Horse       | R | WUYQ00000000  |
| WGS      | lh_36        | Horse       | R | WUYO00000000  |
| WGS      | lh_37        | Horse       | R | WUYN00000000  |
| WGS      | lh_39        | Horse       | R | WUXC00000000  |
| WGS      | lh_40        | Horse       | R | WUYM00000000  |
| WGS      | lh_41        | Horse       | R | WUYL00000000  |
| WGS      | lh_43        | Horse       | R | WUXA00000000  |
| WGS      | lh_44        | Horse       | R | WUYK00000000  |
| WGS      | lh_45        | Horse       | R | WUWZ00000000  |
| WGS      | lh_47        | Horse       | R | WUYJ00000000  |
| WGS      | lh_48        | Horse       | R | WUYI00000000  |
| WGS      | lh_50        | Horse       | R | WUYH00000000  |
| WGS      | lh_8         | Horse       | R | WUXZ00000000  |
| WGS      | PAM2275      | Horse       | R | MULU01000000  |
| WGS      | PAM2277      | Horse       | R | MUMB01000000  |
| WGS      | PAM2280      | Horse       | R | MULW01000000  |
| WGS      | PAM2281      | Horse       | R | MULT01000000  |
| WGS      | PAM2283      | Horse       | R | MULY01000000  |
| WGS      | PAM2284      | Horse       | R | MULZ01000000  |
| WGS      | PAM2285      | Horse       | R | LWTU00000000  |
| WGS      | PAM2286      | Horse       | R | MULX01000000  |
| WGS      | PAM2287      | Horse       | R | LWTV00000000  |
| WGS      | PAM2289      | Horse       | R | MUXK01000000  |
| WGS      | PAM2292      | Horse       | R | MVDT01000000  |
| WGS      | PAM2293      | Horse       | R | MVDU01000000  |
| WGS      | PAM2294      | Horse       | R | MVDV01000000  |
| WGS      | PAM2295      | Horse       | R | MVDQ01000000  |
| WGS      | PAM2296      | Horse       | R | MVDR01000000  |
| WGS      | PAM2297      | Horse       | R | MUXJ01000000  |
| WGS      | lh_1         | Horse       | S | WUYG00000000  |
| WGS      | lh_3         | Horse       | S | WUYE00000000  |
| WGS      | lh_5         | Horse       | S | WUYC00000000  |
| WGS      | lh_6         | Horse       | S | WUYB00000000  |
| WGS      | lh_7         | Horse       | S | WUYA00000000  |
| WGS      | lh_9         | Horse       | S | SAMN13392186  |
| WGS      | lh_13        | Horse       | S | WUXV00000000  |
| WGS      | lh_14        | Horse       | S | WUXU00000000  |
| WGS      | lh_15        | Horse       | S | WUXT00000000  |
| WGS      | lh_22        | Horse       | S | WUXN00000000  |
| WGS      | lh_31        | Horse       | S | WUXF00000000  |
| WGS      | lh_33        | Horse       | S | WUXE00000000  |
| WGS      | lh_35        | Horse       | S | WUYP00000000  |
| WGS      | lh_38        | Horse       | S | WUXD00000000  |
| WGS      | lh_42        | Horse       | S | WUXB00000000  |
| WGS      | lh_46        | Horse       | S | WUWY00000000  |
| WGS      | PAM2274      | Horse       | S | LWTQ00000000  |
| WGS      | PAM2276      | Horse       | S | LWTR00000000  |
| WGS      | PAM2282      | Horse       | S | LWTT00000000  |
| WGS      | N1301        | Environment | S | LRRA00000000  |
| WGS      | ATCC 13557   | -           | S | JAFFSZ0100000 |
| WGS      | ATCC 33707   | -           | S | ADNW00000000  |
| Complete | FDAARGOS_952 | -           | S | CP065594      |

|          |             |             |   |                            |
|----------|-------------|-------------|---|----------------------------|
| WGS      | DE0128      | Environment | S | VEFT01000000               |
| WGS      | DE0411      | Environment | S | VDTB01000000               |
| WGS      | DSM 20307   | Horse       | S | LWTX00000000               |
| WGS      | DSM 20295   | Environment | S | LRRF00000000               |
| Complete | DSSKP-R-001 | Environment | S | CP027793,CP027794,CP027795 |
| WGS      | N1288       | Pig         | S | LRQY00000000               |
| WGS      | N1295       | Horse       | S | LRQZ00000000               |
| Complete | 103S        | Horse       | S | NC_014659                  |
| WGS      | NCTC1621    | -           | S | UGVJ01000000               |
| WGS      | NCTC5650    | -           | S | UGVG01000000               |
| WGS      | PAM1204     | Sheep       | S | LWBN00000000               |
| WGS      | PAM1216     | Horse       | S | LWHS00000000               |
| WGS      | PAM1271     | Horse       | S | LWIC00000000               |
| WGS      | PAM1340     | Horse       | S | LWHT00000000               |
| WGS      | PAM1354     | Human       | S | LWHU00000000               |
| WGS      | PAM1357     | Horse       | S | LWHV00000000               |
| WGS      | PAM1413     | Human       | S | LWHW00000000               |
| WGS      | PAM1422     | Horse       | S | LWHX00000000               |
| WGS      | PAM1475     | Pig         | S | LWHY00000000               |
| WGS      | PAM1496     | Pig         | S | LWHZ00000000               |
| WGS      | PAM1533     | Pig         | S | LWIA00000000               |
| WGS      | PAM1557     | Cow         | S | LWIB00000000               |
| WGS      | PAM1571     | Cow         | S | LWTO00000000               |
| WGS      | PAM1572     | Cow         | S | LXFI00000000               |
| WGS      | PAM1593     | Human       | S | LXFH00000000               |
| WGS      | PAM1600     | Horse       | S | LXFG00000000               |
| WGS      | PAM1637     | Horse       | S | LWHR00000000               |
| WGS      | PAM1643     | Horse       | S | LWTP00000000               |
| WGS      | PAM2012     | Cow         | S | LWTY00000000               |
| WGS      | UBA6654     | Environment | S | DKKY01000000               |
| Complete | WY          | Human       | S | CP041647,CP041646          |

---

**Table S2.** In the in-silico validation of oligos and probes in 25 non-*R. equi* bacterial genomes (chromosomes and plasmids)

| Species chromosome                                                        | RefSeq no.      | Match with Rhodo_Dlab |         |         | Match with Erm46_Dlab |         |         | Match with Erm51_Dlab |    |          |
|---------------------------------------------------------------------------|-----------------|-----------------------|---------|---------|-----------------------|---------|---------|-----------------------|----|----------|
|                                                                           |                 | FW                    | RV      | Probe   | FW                    | RV      | Probe   | FW                    | RV | Probe    |
| <i>Rhodococcus triatomae</i> strain DSM 44,893                            | GCF_014217765.1 | No                    | No      | No      | No                    | No      | No      | No                    | No | Yes (8)  |
| <i>Rhodococcus defluvi</i> strain Ca11                                    | GCF_000738775.1 | Yes (0)               | No      | No      | No                    | Yes (4) | Yes (7) | No                    | No | Yes (8)* |
| <i>Rhodococcus ruber</i> strain C1                                        | GCF_016804345.1 | No                    | No      | No      | No                    | No      | No      | No                    | No | Yes (6)  |
| <i>Rhodococcus rhodochrous</i> strain EP4                                 | GCF_003004765.2 | No                    | No      | No      | No                    | No      | No      | No                    | No | Yes (4)  |
| <i>Rhodococcus qingshengii</i> strain CS98                                | GCF_015099595.1 | No                    | Yes (1) | No      | No                    | No      | No      | No                    | No | No       |
| <i>Rhodococcus pyridinivorans</i> strain SB3094                           | GCF_000511305.1 | No                    | No      | No      | No                    | No      | No      | No                    | No | Yes (6)  |
| <i>Rhodococcus opacus</i> strain 1CP                                      | GCF_001685605.1 | No                    | No      | No      | No                    | No      | No      | No                    | No | Yes (6)  |
| <i>Rhodococcus jostii</i> strain DSM 44719                                | GCF_900105375.1 | No                    | No      | No      | No                    | Yes (5) | Yes (7) | No                    | No | No       |
| <i>Rhodococcus fascians</i> strain D188                                   | GCF_001620305.1 | No                    | No      | No      | No                    | No      | Yes (7) | No                    | No | No       |
| <i>Rhodococcus erythropolis</i> strain R138                               | GCF_000696675.2 | No                    | Yes (0) | No      | No                    | No      | No      | No                    | No | No       |
| <i>Mannheimia haemolytica</i> strain USDA-ARS-USMARC-191                  | GCF_002285575.1 | No                    | No      | No      | No                    | Yes (5) | No      | No                    | No | No       |
| <i>Nocardia asteroides</i> strain NCTC11293                               | GCF_900637185.1 | No                    | Yes (1) | No      | No                    | No      | No      | No                    | No | No       |
| <i>Mycolicibacterium smegmatis</i> strain FDAARGOS_679                    | GCF_013349145.1 | No                    | Yes (2) | No      | No                    | No      | No      | No                    | No | No       |
| <i>Bordetella bronchiseptica</i> strain NCTC10543                         | GCA_900636925.1 | No                    | Yes (1) | No      | No                    | No      | No      | No                    | No | No       |
| <i>Salmonella enterica</i> subsp. <i>enterica</i> serovar Typhimurium LT2 | GCA_000006945.2 | No                    | No      | No      | Yes (4)               | No      | No      | No                    | No | No       |
| <i>Actinobacillus equuli</i> subsp. <i>equuli</i> strain 19392            | GCA_000801145.1 | No                    | No      | No      | No                    | No      | No      | No                    | No | No       |
| <i>Pasteurella multocida</i> strain 20N                                   | GCF_003061275.1 | No                    | No      | No      | Yes (4)               | No      | No      | No                    | No | No       |
| <i>Streptococcus equi</i> subsp. <i>zooepidemicus</i>                     | GCF_015689455.1 | No                    | No      | No      | No                    | Yes (5) | No      | No                    | No | No       |
| <i>Escherichia coli</i> strain 3_2_53FAA                                  | GCA_000157115.2 | No                    | No      | Yes (6) | No                    | No      | No      | No                    | No | No       |
| <i>Klebsiella pneumoniae</i> subsp. <i>pneumoniae</i> HS11286             | GCA_000240185.2 | No                    | No      | No      | No                    | No      | No      | No                    | No | Yes (7)  |
| <i>Corynebacterium pseudotuberculosis</i> strain C231                     | GCF_000144675.2 | No                    | No      | No      | Yes (5)               | No      | No      | No                    | No | No       |
| <i>Staphylococcus aureus</i> subsp. <i>aureus</i> strain NCTC 8325        | GCF_000013425.1 | No                    | No      | No      | No                    | Yes (4) | No      | No                    | No | No       |
| <i>Pseudomonas aeruginosa</i> strain PAO1                                 | GCA_000006765.1 | No                    | No      | No      | No                    | No      | No      | No                    | No | Yes (5)  |
| <i>Dietzia aerolata</i>                                                   | GCF_014144865.1 | No                    | No      | No      | No                    | Yes (5) | No      | No                    | No | Yes (8)  |

| Species plasmids                                                          | RefSeq no.  | Match with Rhodo_Dlab |         |          | Match with Erm46_Dlab |    |       | Match with Erm51_Dlab |    |         |
|---------------------------------------------------------------------------|-------------|-----------------------|---------|----------|-----------------------|----|-------|-----------------------|----|---------|
|                                                                           |             | FW                    | RV      | Probe    | FW                    | RV | Probe | FW                    | RV | Probe   |
| <i>Rhodococcus ruber</i> strain C1                                        | CP044212.1  | No                    | No      | No       | No                    | No | No    | No                    | No | Yes (7) |
|                                                                           | CP044213.1  | No                    | No      | Yes (10) | No                    | No | No    | No                    | No | No      |
| <i>Rhodococcus qingshengii</i> strain CS98                                | AP023173.1  | No                    | No      | No       | No                    | No | No    | No                    | No | Yes (6) |
| <i>Rhodococcus pyridinivorans</i> strain SB3094                           | NC_023144.1 | No                    | No      | No       | No                    | No | No    | No                    | No | Yes (7) |
|                                                                           | NC_023145.1 | No                    | No      | No       | No                    | No | No    | No                    | No | No      |
| <i>Rhodococcus opacus</i> strain 1CP                                      | CP009112.1  | No                    | No      | No       | Yes (3)               | No | No    | No                    | No | No      |
|                                                                           | CP009113.1  | No                    | No      | No       | No                    | No | No    | No                    | No | Yes (9) |
| <i>Rhodococcus fascians</i> strain D188                                   | CP015236.1  | No                    | No      | No       | No                    | No | No    | No                    | No | Yes (8) |
|                                                                           | CP015237.1  | No                    | No      | No       | No                    | No | No    | No                    | No | Yes (7) |
| <i>Rhodococcus erythropolis</i> strain R138                               | CP007256.1  | No                    | No      | No       | No                    | No | No    | No                    | No | No      |
|                                                                           | CP007257.1  | No                    | No      | No       | No                    | No | No    | No                    | No | Yes (6) |
| <i>Mannheimia haemolytica</i> strain USDA-ARS-USMARC-191                  | CP023045.1  | No                    | No      | No       | No                    | No | No    | No                    | No | No      |
| <i>Mycolicibacterium smegmatis</i> strain FDAARGOS_679                    | CP054796.1  | No                    | No      | No       | No                    | No | No    | No                    | No | No      |
| <i>Salmonella enterica</i> subsp. <i>enterica</i> serovar Typhimurium LT2 | AE006471.2  | No                    | No      | No       | No                    | No | No    | Yes (4)               | No | No      |
|                                                                           | NC_016838.1 | No                    | No      | No       | No                    | No | No    | No                    | No | No      |
|                                                                           | NC_016839.1 | No                    | Yes (3) | No       | No                    | No | No    | No                    | No | No      |
| <i>Klebsiella pneumoniae</i> subsp. <i>pneumoniae</i> HS11286             | NC_016840.1 | Yes (7)               | No      | No       | No                    | No | No    | No                    | No | No      |
|                                                                           | NC_016841.1 | No                    | No      | No       | No                    | No | No    | No                    | No | No      |
|                                                                           | NC_016846.1 | No                    | No      | No       | No                    | No | No    | No                    | No | Yes (9) |
|                                                                           | NC_016847.1 | No                    | No      | No       | No                    | No | No    | No                    | No | No      |

FW represents forward oligo; RV represents the reverse oligo; in brackets no. of SNP difference between oligo/probe and reference genome; \*multiple alignments in the genome. In a second assay, we looked at the in-silico exclusivity by aligning the three oligo sets to 23 non-*R. equi* reference genomes selected based on previous research<sup>9,10</sup>, genetic proximity to *R. equi*, or presence in the equine respiratory tract (Table 3). Although the three oligo sets showed potential illegitimate alignments with some genomes, no amplification was predicted because the forward and reverse oligos never matched the same genomic element.

Figure S1. Standard curves for qPCR in mocking communities

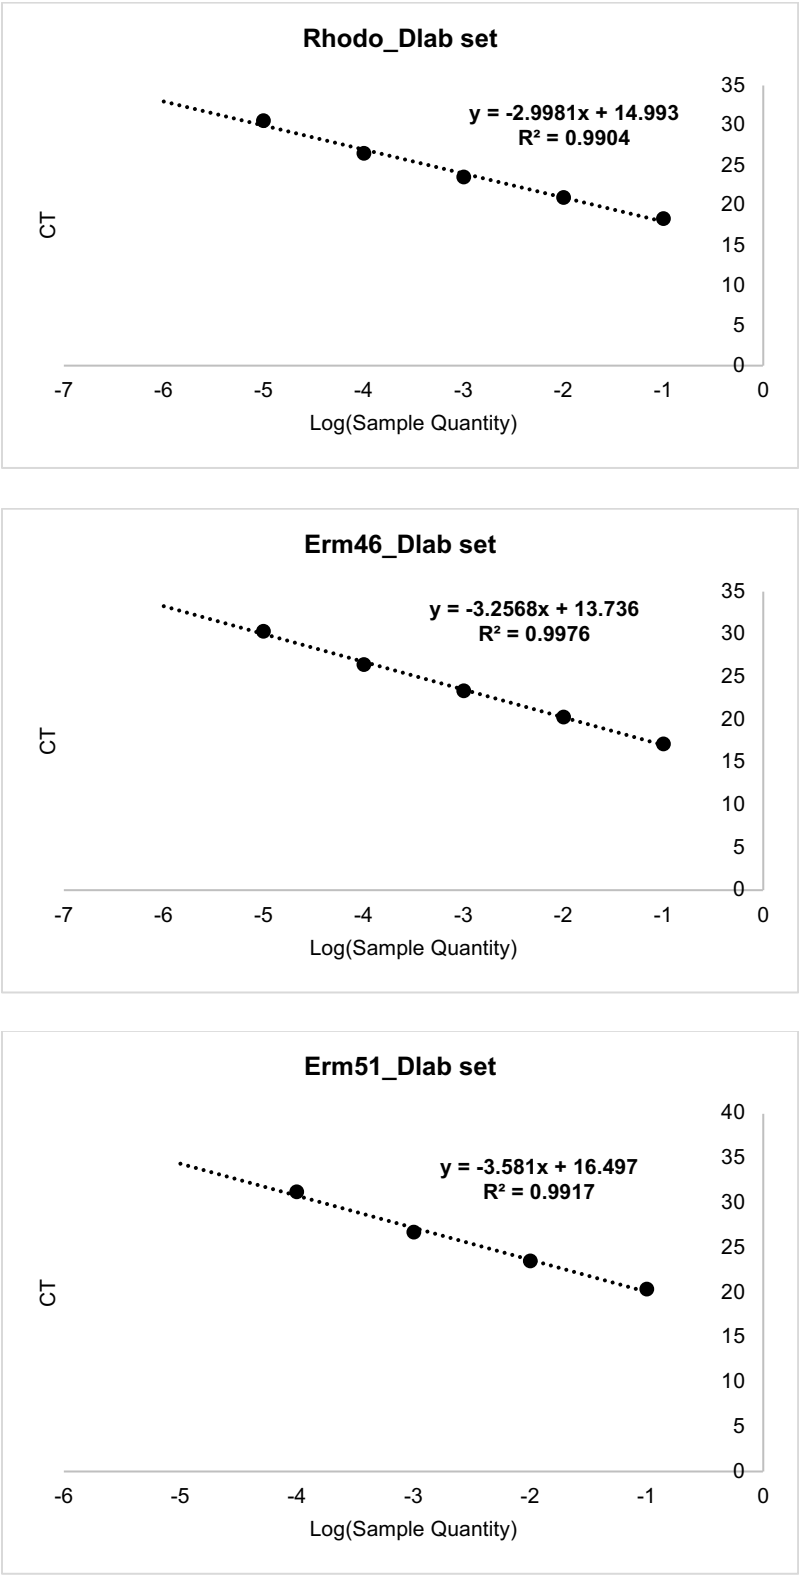

**Table S3.** *R. equi* clinical isolates tested in this study

| Sample     | Isolation source | Macrolide susceptibility | CT Rhodo_Dlab set | CT Erm46_Dlab set | CT Erm51_Dlab set |
|------------|------------------|--------------------------|-------------------|-------------------|-------------------|
| A15-04522  | Dog              | S                        | 23.24             | -                 | -                 |
| A15-08158  | Dog              | S                        | 22.22             | -                 | -                 |
| A17-41305  | Horse            | S                        | 30.4              | -                 | -                 |
| A21-34771  | Dog              | S                        | 21.9              | -                 | -                 |
| A21-38046  | Racoon           | S                        | 21.01             | -                 | -                 |
| A21-40530  | Goat             | S                        | 24.26             | -                 | -                 |
| A21-49275  | Dog              | S                        | 33.91             | -                 | -                 |
| A22-06434  | Dog              | S                        | 21.71             | -                 | -                 |
| A22-10736  | Dog              | S                        | 21.87             | -                 | -                 |
| A22-473838 | Horse            | S                        | 26.37             | -                 | -                 |
| A5-47992   | Dog              | S                        | 20.27             | -                 | -                 |
| A9-04013   | Horse            | S                        | 37.17             | -                 | -                 |
